# Supplementary material for: Clinical Application of Intravitreal Aflibercept Injection for Diabetic Macular Edema Comparing Two Loading Regimens
Source: MDPI journal article supplement (doi:10.3390/medicina59030558), 2023-03-12
Supplement: s1 [file s1]

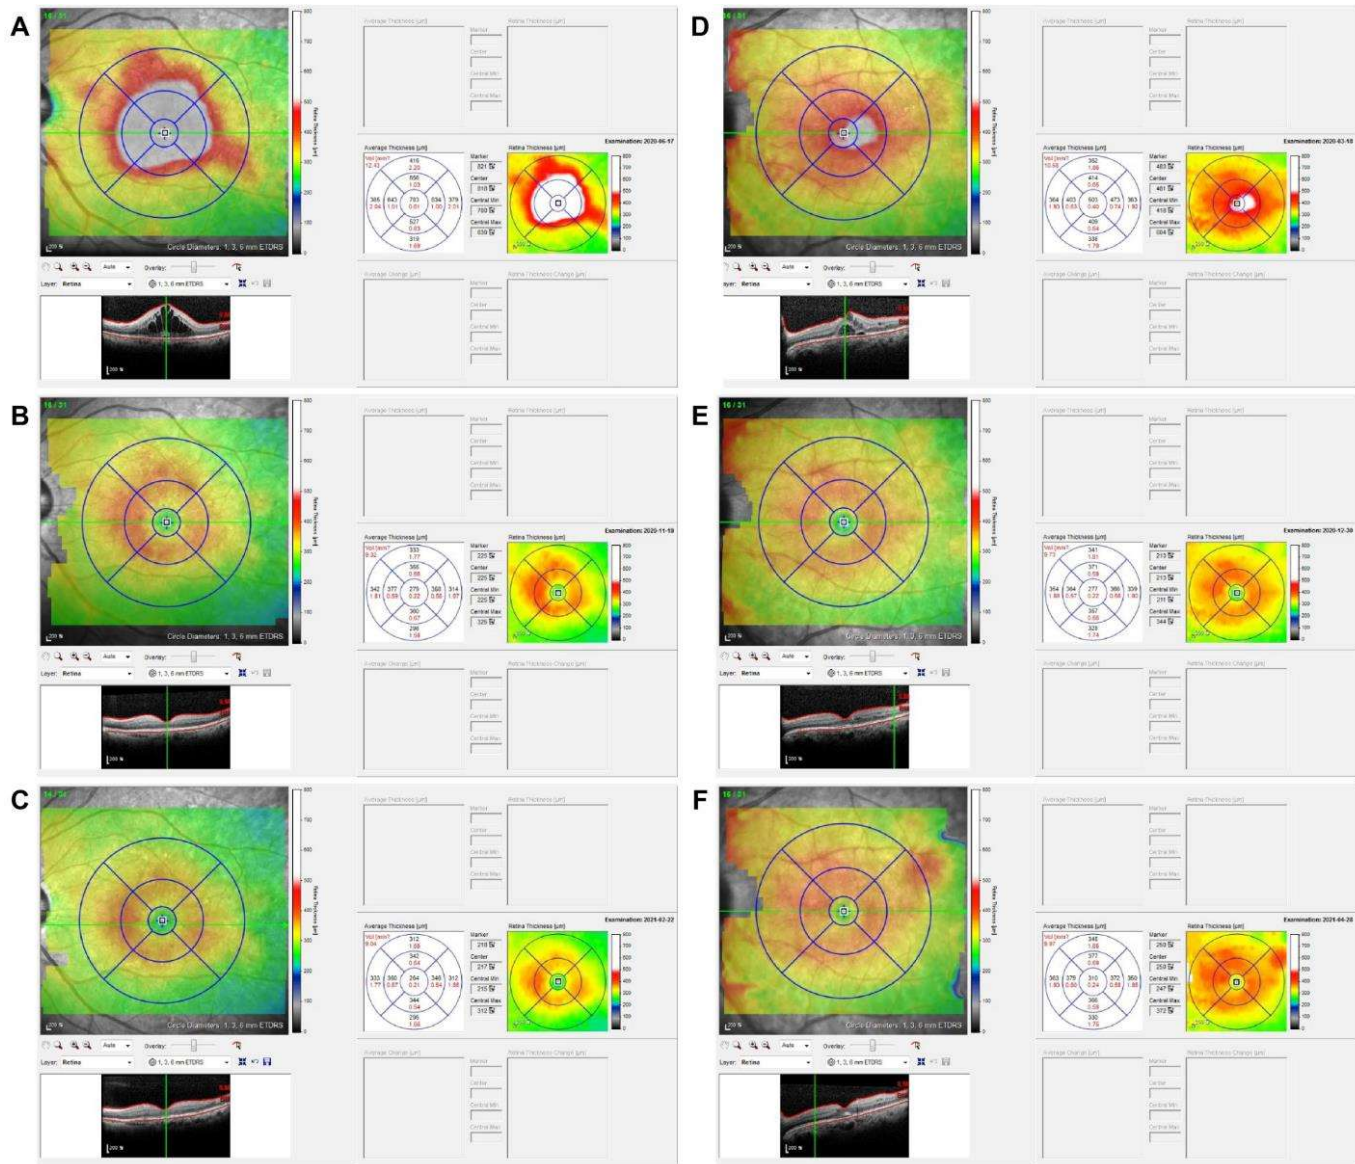

**Figure S1.** Representative examples of measurements of central retinal thickness (CRT). (A) Baseline CRT of a 47-year old male with diabetic macular edema was 783  $\mu\text{m}$ , which was decreased to 279  $\mu\text{m}$  after 3 months (B) and to 264  $\mu\text{m}$  after 6 months (C) following 3 consecutive monthly loading. (D) Baseline CRT of a 49-year old female with diabetic macular edema was 503  $\mu\text{m}$ , which was decreased to 277  $\mu\text{m}$  after 3 months (E) and to 310  $\mu\text{m}$  after 6 months (F) following 5 consecutive monthly loading.
